# Supplementary material for: Calcipotriol Targets LRP6 to Inhibit Wnt Signaling in Pancreatic Cancer
Source: Oxford University Press journal article supplement (doi:10.1158/1541-7786.mcr-15-0204), 2015-07-29
Supplement: 15417786mcr150204-sup-148285_1_supp_3044244_nqvbzb.xlsx [file 15417786mcr150204-sup-148285_1_supp_3044244_nqvbzb.xlsx]

## Sheet: qPCR primers
Gene	QPCR Primer	Sequence 5' → 3'
ACTB	FOR	CCAACCGCGAGAAGATGA
	REV	CCAGAGGCGTACAGGGATAG
AXIN2	FOR	GAAGCTGGAGTTGGAGAGCCGCC
	REV	TCTCTCTTCATCCTCTCGGATCTGC
LRP6	FOR	TACAAGGTGTTCTTGCCCCA
	REV	TGTTGGAGGTTCTCCACATGAT
LDLRAP1	FOR	AGAGCCAGCACAACCAGA
	REV	CTTGGACACCTGCCAAAA
VDR	FOR	ACTTGCATGAGGAGGAGCAT
	REV	TCGGCTAGCTTCTGGATCAT
